# Supplementary material for: Single nucleotide variants in nuclear pore complex disassembly pathway associated with poor survival in osteosarcoma
Source: Frontiers journal article supplement (doi:10.3389/fgene.2024.1303404), 2024-03-18

R-HSA-3301854

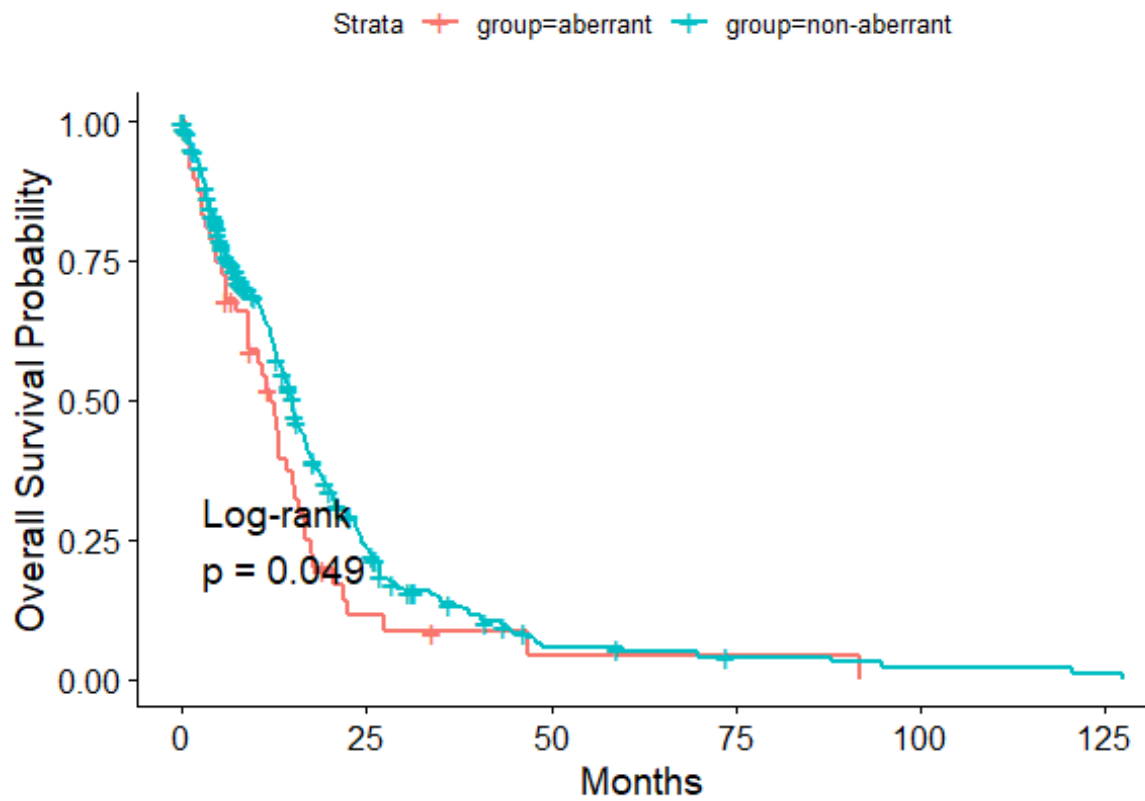

Supplement: Image_4.PDF [file Image_4.PDF]
